# Supplementary material for: Problem solving in chemistry supported by metacognitive scaffolding: teaching associates’ perspectives and practices
Source: Royal Society of Chemistry journal article supplement (doi:10.1039/d1rp00242b), 2022-01-01

## Electronic Supplementary Information

for the manuscript:

### **Problem solving in chemistry supported by metacognitive scaffolding: Teaching associates' perspectives and practices**

Kimberly Vo<sup>a</sup>, Mahbub Sarkar<sup>b</sup>, Paul J. White<sup>a</sup>, Elizabeth Yuriev<sup>a,\*</sup>

<sup>a</sup>Faculty of Pharmacy and Pharmaceutical Sciences, Monash University, Parkville VIC 3052, Australia

<sup>b</sup>Faculty of Medicine, Nursing and Health Sciences, Monash University, Clayton VIC 3800, Australia

\* Correspondence: Tel: Int +61 3 9903 9611, E-mail: [elizabeth.yuriev@monash.edu](mailto:elizabeth.yuriev@monash.edu)

#### Contents:

Appendix 1: Round 1 interview protocol

Appendix 2: Round 2 interview protocol

Appendix 3: Personal details questionnaire

Appendix 4: Codebook tree for instructor interviews

## Appendix 1: Round 1 interview protocol

- 1. Problem-solving workflow Understand-Analyse-Plan-Implement-Evaluate (i.e. Goldilocks)**
  - 1.1. What did you think about using the problem-solving workflow to help teach problem solving?
  - 1.2. Did your students find any of the steps too difficult to perform?
  - 1.3. Do you think students gained confidence as the result of using the workflow?
  - 1.4. Any other comments about the workflow?
- 2. Evaluation**
  - 2.1. How did your students feel about having their problem-solving skills evaluated?
  - 2.2. Do you think the evaluation changes how students prepare for/perform in classes?
  - 2.3. Any other comments about evaluation?
- 3. Expectations**
  - 3.1. Did you feel clear about what was expected of you in these classes?
  - 3.2. Did your students understand what was expected of them in these classes?
  - 3.3. If you or your students felt confused with respect to expectations, how do you think this lack should be addressed?
  - 3.4. Any other comments about expectations?
- 4. Problem sets (Applieds and Workshops)**
  - 4.1. Did you use the problem-solving workflow when preparing for these classes?
  - 4.2. Did your students use the problem-solving workflow when doing in-class problems?
  - 4.3. Any other comments about problems?
- 5. Instruction**
  - 5.1. Do you feel you received insufficient, appropriate, or excessive guidance during these classes around the problem-solving process?
  - 5.2. Do you feel you gave insufficient, appropriate, or excessive guidance on problem solving during these classes?
  - 5.3. On average, did your students find prompting questions from TAs useful or confusing?

## Appendix 2: Round 2 interview protocol

### 1. TA academic background

- 1.1. As an undergraduate student, were you exposed to structured problem solving such as Goldilocks Help?
  - a. If yes, how has that impacted your problem-solving abilities?
  - b. If no, have you used structured problem solving to solve chemical problems?

### 2. Comparison between semester 1 vs. semester 2

- 2.1. Did student engagement with the scaffold differ between semester 1 and 2? If so, how and why?
- 2.2. How did the use of Google docs change student problem solving/use Goldilocks Help?
- 2.3. In general, how was semester 2 different to semester 1 in terms of teaching/instructing?

### 3. TA's perception of students' scaffold use

- 3.1. Can you describe various approaches students use in their problem solving? Give us a couple of 'student types', when it comes to problem solving.
- 3.2. Do students engage with the scaffold? (incl. rough percentage that do and don't use the scaffold)
- 3.3. Why do students engage with the scaffold? What observable behaviours led to these perceptions?
- 3.4. Why don't students engage with the scaffold? What observable behaviours led to these perceptions?
- 3.5. Have you experienced students who were overly confident in their perceived problem-solving abilities? If so, did their perceptions align with their actual abilities?
- 3.6. Does the level of engagement with the scaffold differ when learning online vs. face-to-face?
- 3.7. Fading process
  - a. Will students use structured problem solving once the scaffold is not constantly reinforced?
  - b. When should we fade the scaffold from students?
  - c. How should we fade the scaffold from students?

### 4. TA use of scaffold

- 4.1. Do you use structured problem solving or an approach such as Goldilocks Help?

### 5. TA teaching with the scaffold

- 5.1. How would you increase student engagement with structure problem solving/Goldilocks helps?
- 5.2. Does teaching with the scaffold differ when teaching online vs. face-to-face?
- 5.3. Do you think the scaffold causes students to create a 'tick box' attitude? If so, how would you address this to ensure meaningful learning?

### Appendix 3: Personal details questionnaire

**1. What is your age?** \_\_\_\_\_

**2. Are you?**

☐ Female

☐ Male

☐ Other

☐ Prefer not to say

**3. Is English your first language?**

☐ Yes

☐ No

If no, please specify your first language \_\_\_\_\_

**4. Please state your academic qualifications and specify the institution?**

☐ PhD \_\_\_\_\_

☐ Masters \_\_\_\_\_

☐ Undergraduate degree \_\_\_\_\_

☐ Other [please specify] \_\_\_\_\_

**5. Do you have any formal postgraduate qualifications in Education (e.g. Graduate Certificate in Education)?**

☐ No

☐ Yes

If yes, please specify \_\_\_\_\_

**6. How many years have you been teaching undergraduate students at the university?**

\_\_\_\_\_

Appendix 4: Codebook tree for instructor interviews (Blue: data analysed, green: theme, orange and white: sub-theme).

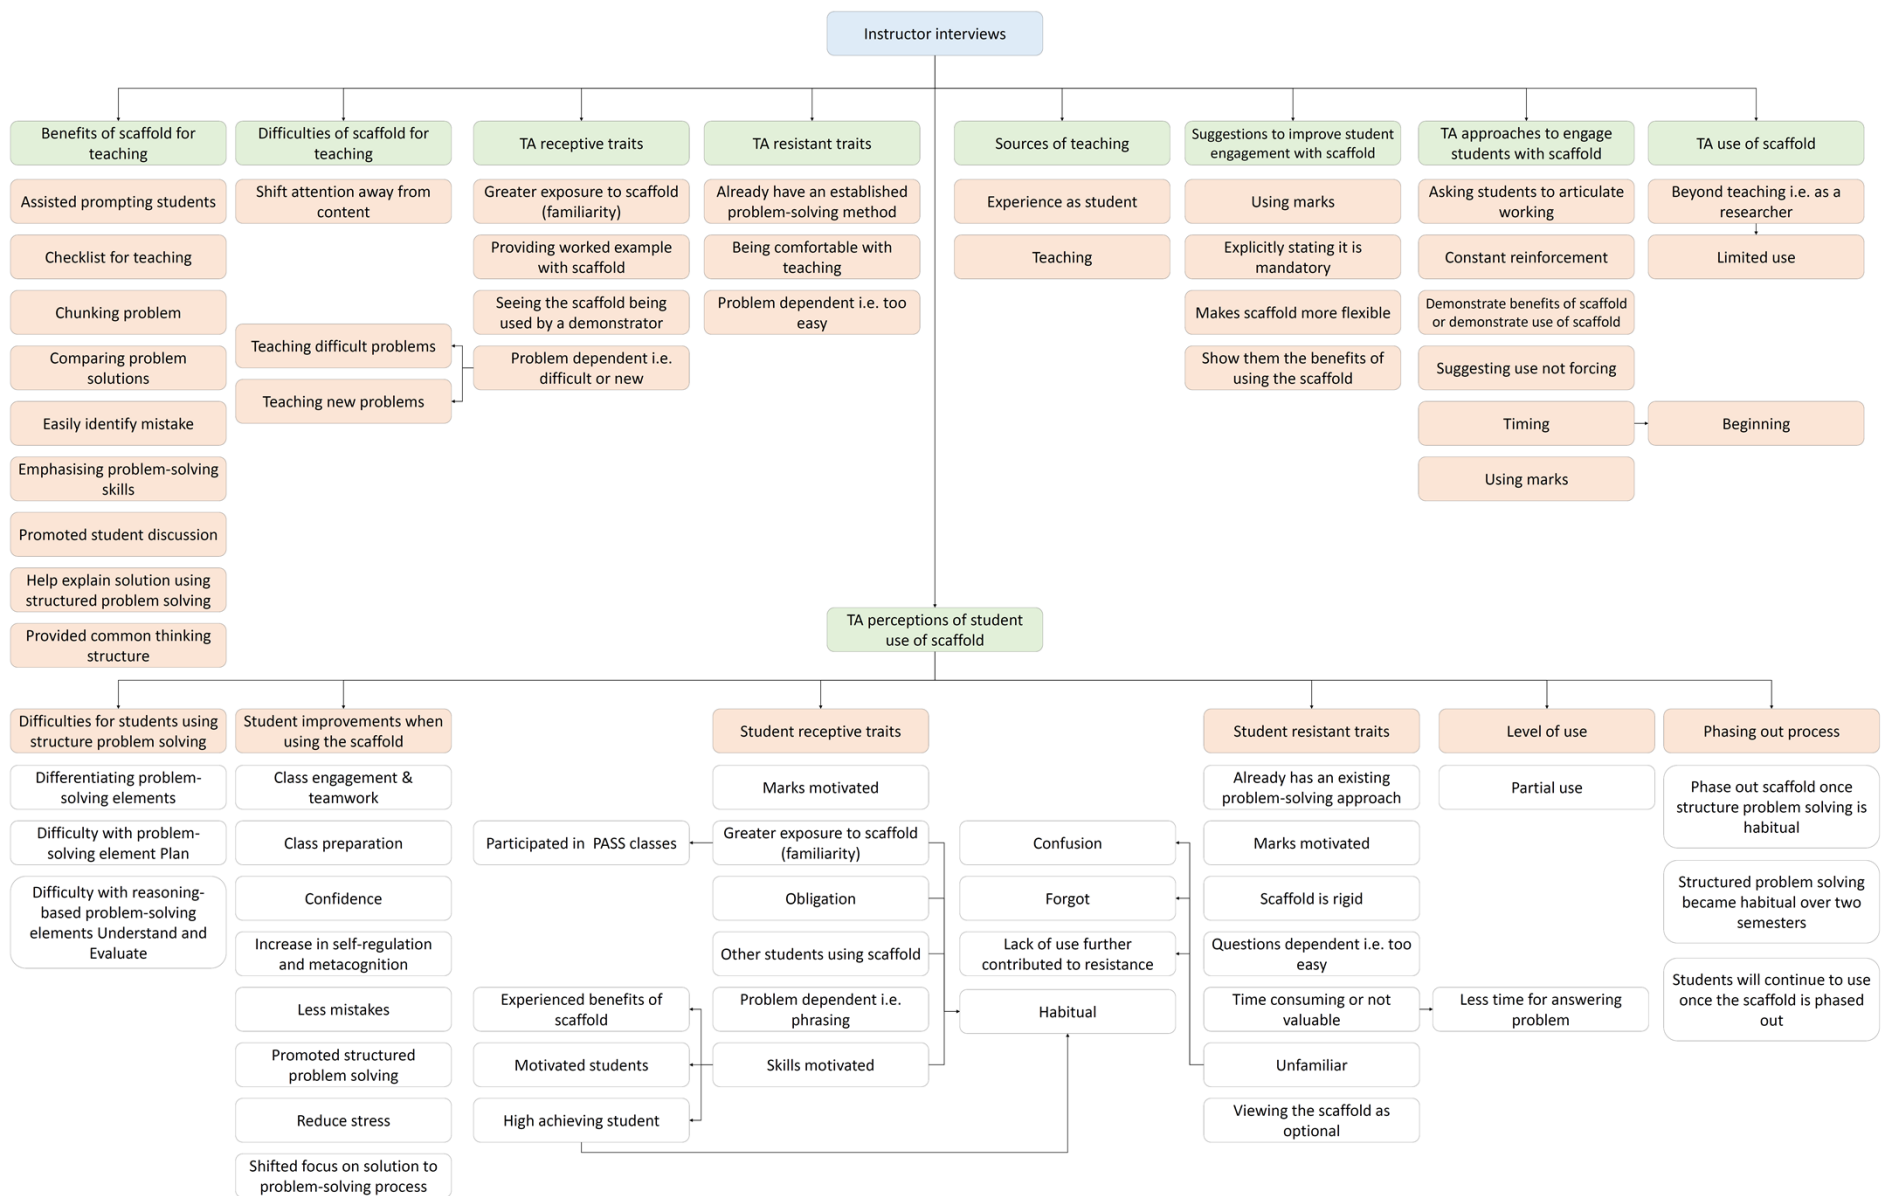

Supplement: d1rp00242b1.pdf [file d1rp00242b1.pdf]
